# Supplementary material for: Formation of a Nanorod-Assembled TiO2 Actinomorphic-Flower-like Microsphere Film via Ta Doping Using a Facile Solution Immersion Method for Humidity Sensing
Source: MDPI journal article supplement (doi:10.3390/nano13020256), 2023-01-06
Supplement: s1 [file s1]

# Formation of a Nanorod-Assembled TiO<sub>2</sub> Actinomorphic-Flower-like Microsphere Film via Ta Doping Using a Facile Solution Immersion Method for Humidity Sensing

Musa Mohamed Zahidi <sup>1,2</sup>, Mohamad Hafiz Mamat <sup>1,\*</sup>, A Shamsul Rahimi A Subki <sup>1,3</sup>, Mohd Hanapiah Abdullah <sup>1,2</sup>, Hamizura Hassan <sup>4</sup>, Mohd Khairul Ahmad <sup>5</sup>, Suriani Abu Bakar <sup>6</sup>, Azmi Mohamed <sup>6</sup> and Bunsho Ohtani <sup>7</sup>

<sup>1</sup> NANO-ElecTronic Centre (NET), School of Electrical Engineering, College of Engineering, Universiti Teknologi MARA, Shah Alam 40450, Selangor, Malaysia;

<sup>2</sup> Centre for Electrical Engineering Studies, Universiti Teknologi MARA Cawangan Pulau Pinang, Permatang Pauh 13500, Pulau Pinang, Malaysia

<sup>3</sup> Faculty of Electrical and Electronic Engineering Technology, Universiti Teknikal Malaysia Melaka, Hang Tuah Jaya, Durian Tunggal 76100, Melaka, Malaysia

<sup>4</sup> Centre for Chemical Engineering Studies, Universiti Teknologi MARA Cawangan Pulau Pinang, Permatang Pauh 13500, Pulau Pinang,

<sup>5</sup> Microelectronic and Nanotechnology — Shamsuddin Research Centre, Faculty of Electrical and Electronic Engineering, Universiti Tun Hussein Onn Malaysia, Batu Pahat 86400, Johor, Malaysia;

<sup>6</sup> Nanotechnology Research Centre, Faculty of Science and Mathematics, Universiti Pendidikan Sultan Idris, Tanjung Malim 35900, Perak, Malaysia;

<sup>7</sup> Graduate School of Environmental Science, Hokkaido University, Sapporo 060-0810, Japan;

\* Correspondence: mhmamat@uitm.edu.my; Tel.: +603-552-1182

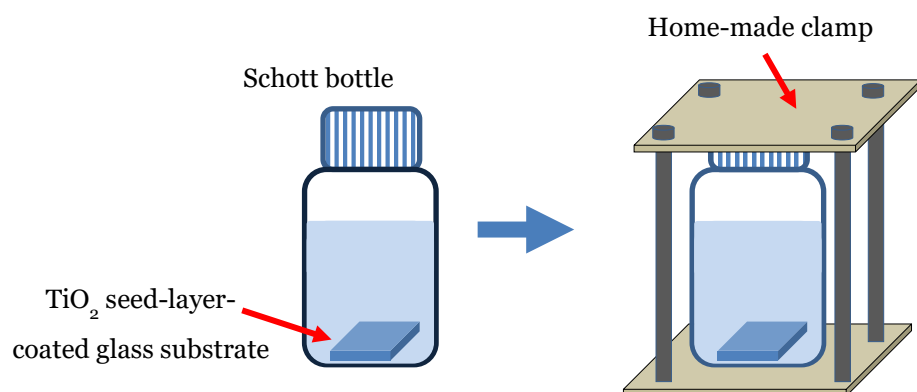

**Figure S1.** Sample preparation setup for TiO<sub>2</sub> solution immersion method.

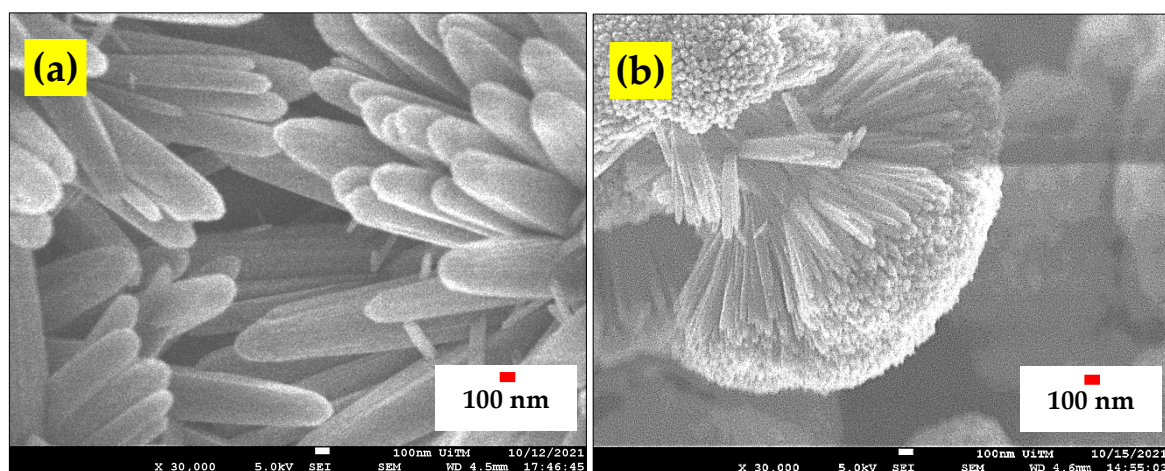

Figure S2. FESEM image of: (a) UTD and (b) TAFM-3 at 30,000  $\times$  magnification.

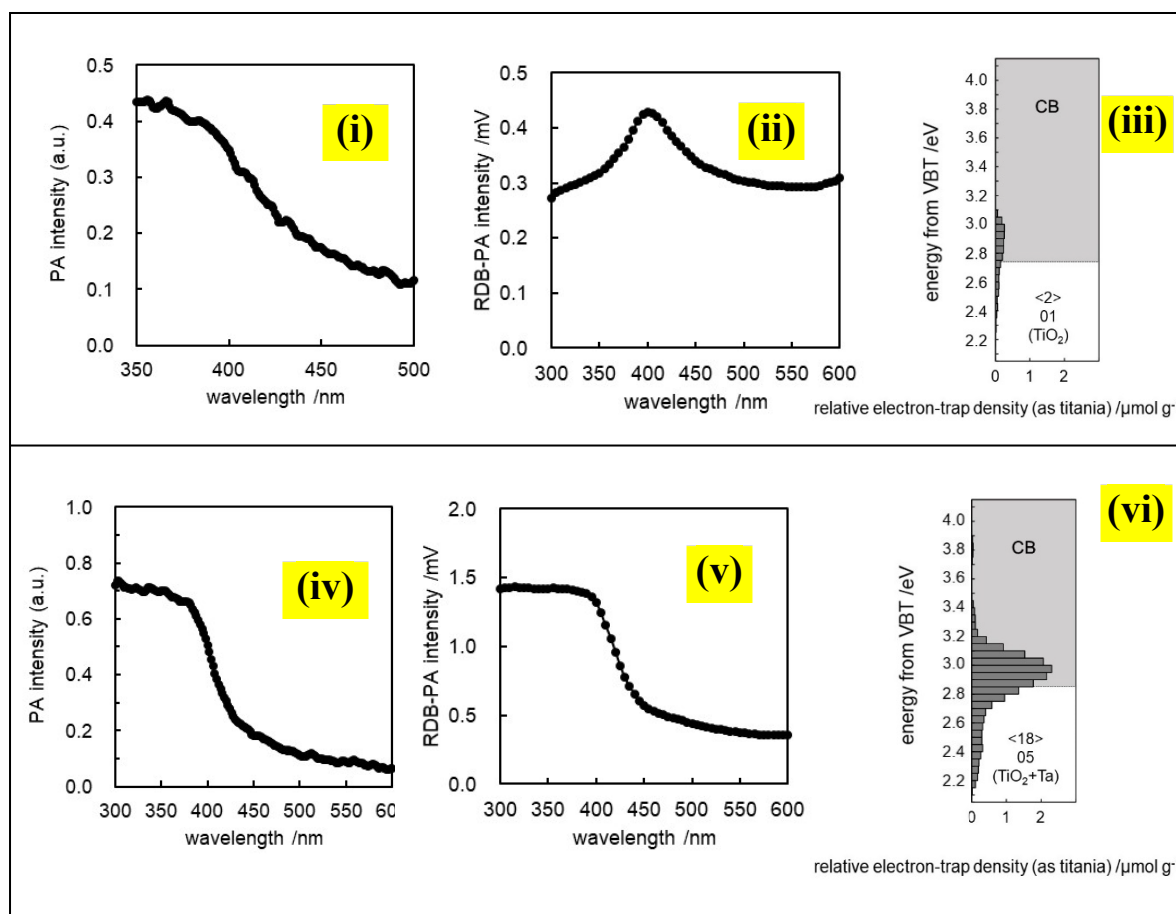

Figure S3. RDB-PAS measurement results of: (i-iii) UTD and (iv-vi) TAFM-3.

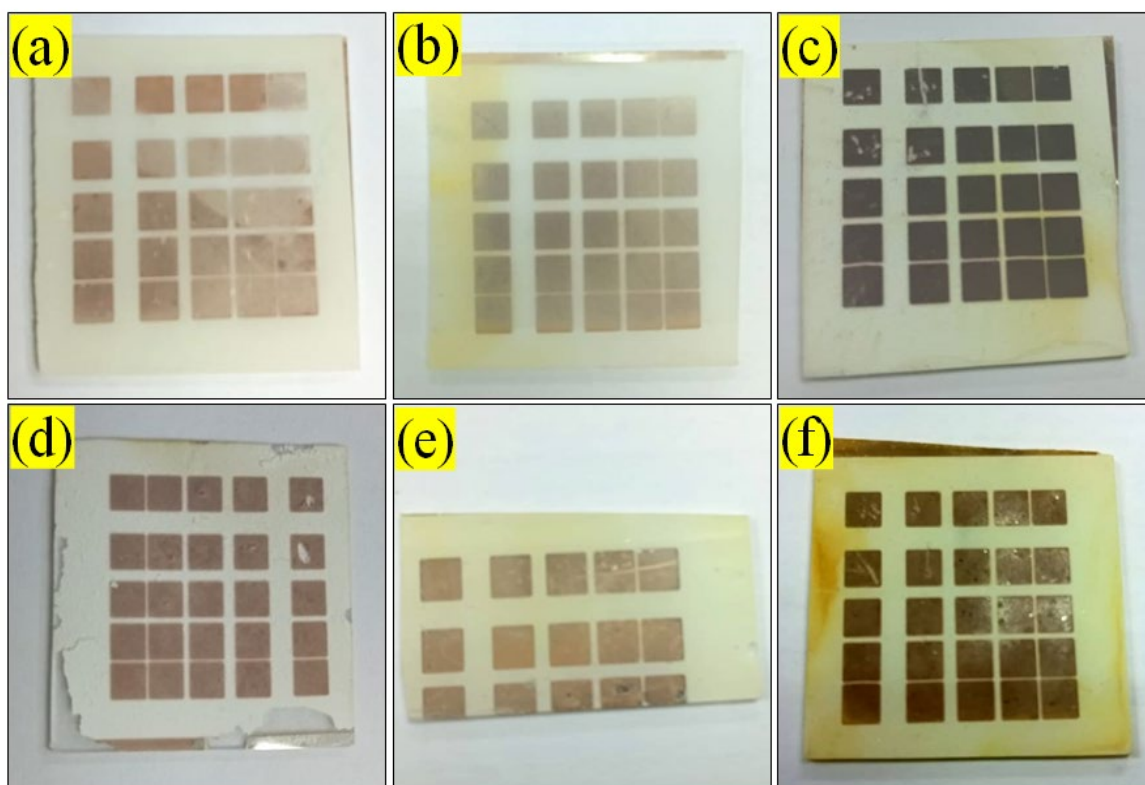

**Figure S4.** Photo image of humidity sensor made of: (a) UTD, (b) TAFM-1, (c) TAFM-3, (d) TAFM-5, (e) TAFM-7, and (f) TAFM-9.

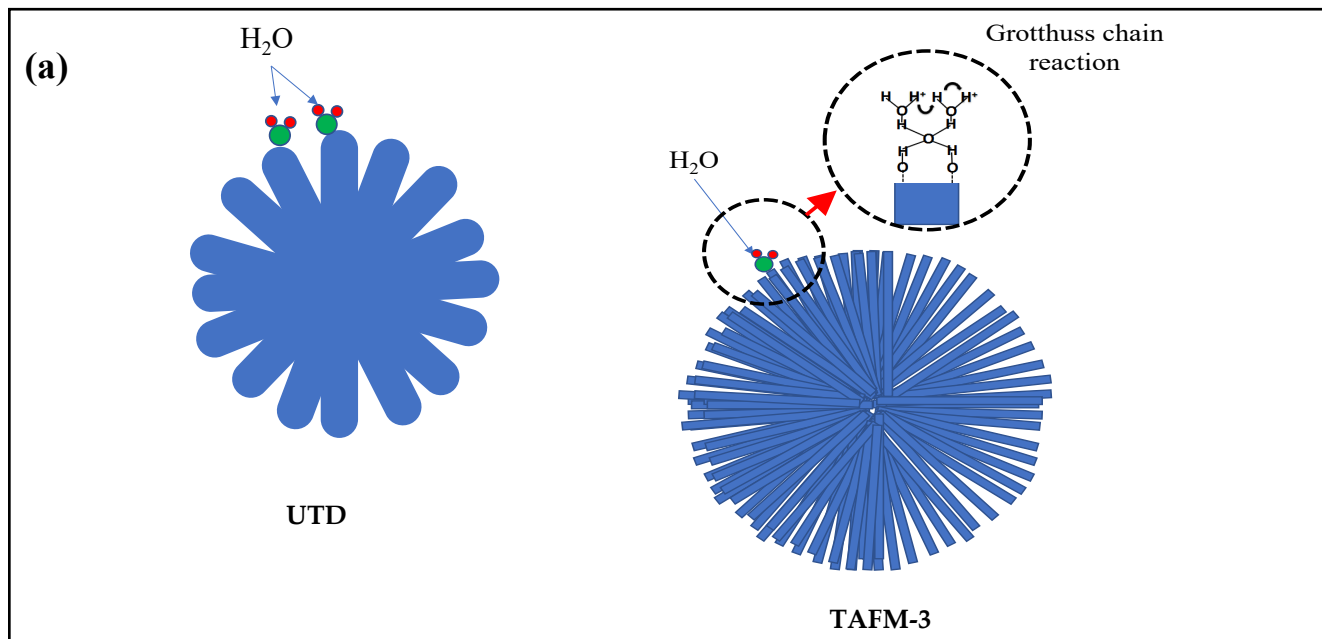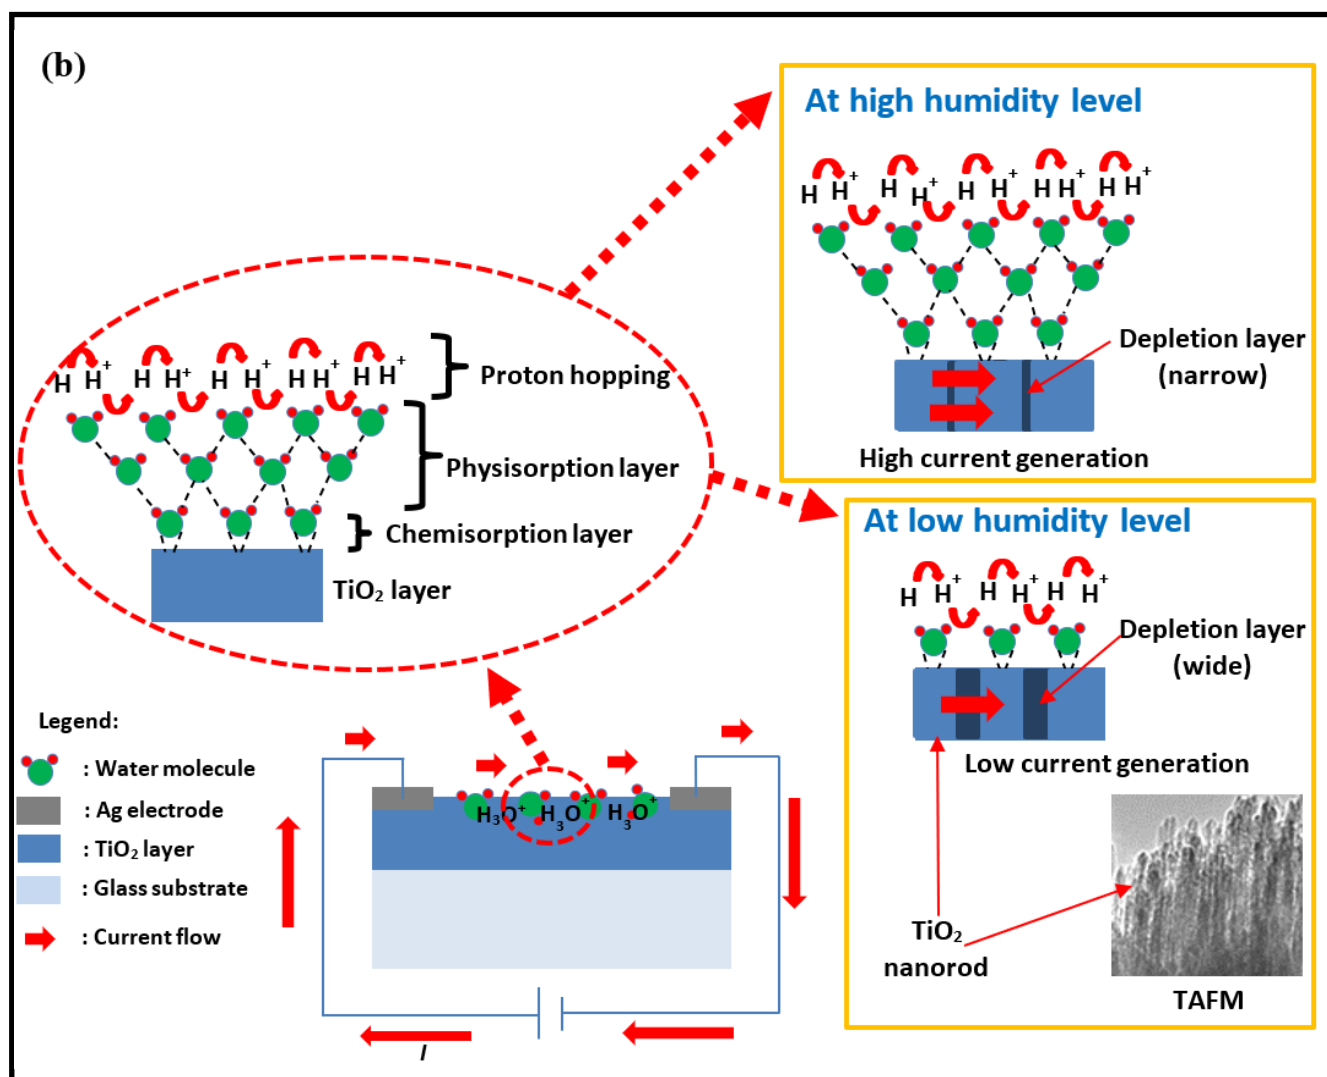

(c)

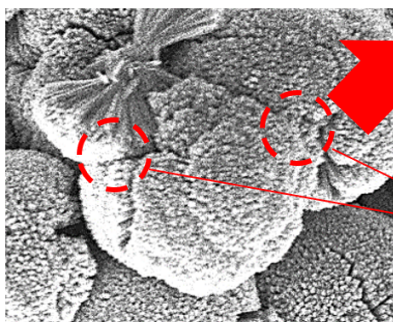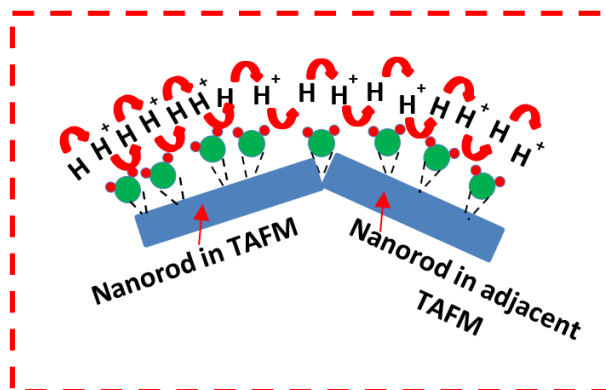

Interconnected TAFMs formed TAFM's network for current flow across the film through the proton hopping mechanism

**Figure S5.** (a) Humidity detection mechanism of UTD and TAFM-3. (b) Current flow of humidity sensor induced by ionic conduction under humid condition. (c) Proton hopping mechanism between the nanorod in the TAFM and the nanorod in the adjacent TAFM.
